# Supplementary material for: Nuciferine prevents obesity by activating brown adipose tissue
Source: Royal Society of Chemistry journal article supplement (doi:10.1039/d3fo03632d), 2023-11-07
Supplement: d3fo03632d2.pdf [file d3fo03632d2.pdf]

1 Supplementary Table. Primers for RT-PCR

| <b>Gene</b>        | <b>Forward</b>             | <b>Reverse</b>           |
|--------------------|----------------------------|--------------------------|
| <i>COX2</i>        | GCCGACTAAATCAAGCAACA       | CAATGGGCATAAAGCTATGG     |
| <i>NRF2</i>        | TAGATGACCATGAGTCGCTTG<br>C | GCCAAACTTGCTCCATGTCC     |
| <i>PGC1-<br/>α</i> | ACAGCTTTCTGGGTGGATTG       | TGAGGACCGCTAGCAAGTTT     |
| <i>RXRA</i>        | CACACCCACATTGGGCTTC        | GAGGCCATATTTCTGAGGG<br>A |
| <i>TFAM</i>        | GTCCATAGGCACCGTATTGC       | CCCATGCTGGAAAAACTT       |
| <i>UCP1</i>        | GGCAAAAACAGAAGGATTGC       | TAAGCCGGCTGAGATCTTGT     |

2

3
